# Supplementary material
Source: Springer Nature journal article supplement (https://www.springermedizin.de/resource/supplementary/13075_2013_4379_MOESM1_ESM.pdf/9696490)
Supplement: MOESM1 [file 9696490]

**LIST OF INSTITUTIONAL REVIEW BOARDS/INDEPENDENT ETHICS COMMITTEES**

| <b>Site number</b>     | <b>Principal investigator</b>        | <b>IRB/IEC name, address, and committee chairperson</b>                                                                                                                                                                                 |
|------------------------|--------------------------------------|-----------------------------------------------------------------------------------------------------------------------------------------------------------------------------------------------------------------------------------------|
| Central IEC<br>Belgium |                                      | Commissie Medische Ethiek<br>UZ Leuven campus Gasthuisberg<br>Herestraat 49<br>3000 Leuven<br>BELGIUM<br>Chairperson: Prof. W. Van den Bogaert, MD                                                                                      |
| 150                    | de Vlam MD, Kurt<br>(did not enroll) | See above; Commissie Medische Ethiek UZ Leuven campus<br>Gasthuisberg                                                                                                                                                                   |
| 151                    | Malaise MD, Michel                   | See above; Commissie Medische Ethiek UZ Leuven campus<br>Gasthuisberg                                                                                                                                                                   |
| 152                    | van den Bosch MD, Filip              | See above; Commissie Medische Ethiek UZ Leuven campus<br>Gasthuisberg                                                                                                                                                                   |
| 153                    | Margaux MD, Joëlle                   | See above; Commissie Medische Ethiek UZ Leuven campus<br>Gasthuisberg                                                                                                                                                                   |
| Central IEC<br>France  | --                                   | Comité de Protection des Personnes (CPP)<br>Ile de France VIII<br>Hôpital Ambrose Paré<br>Laboratoire d'Anatomopathologie<br>9, avenue Charles-de-Gaulle<br>92100 Boulogne-Billancourt<br>FRANCE<br>Chairperson: Frédérique Barthod, MD |
| 200                    | Breban MD, Maxime                    | See above; Comité de Protection des Personnes (CPP) Ile de<br>France VIII                                                                                                                                                               |

| Site number            | Principal investigator                  | IRB/IEC name, address, and committee chairperson                                                                                                                                                                                  |
|------------------------|-----------------------------------------|-----------------------------------------------------------------------------------------------------------------------------------------------------------------------------------------------------------------------------------|
| 201                    | Flipo MD, René-Marc<br>(did not enroll) | See above; Comité de Protection des Personnes (CPP) Ile de France VIII                                                                                                                                                            |
| 202                    | Goupille MD, Philippe                   | See above; Comité de Protection des Personnes (CPP) Ile de France VIII                                                                                                                                                            |
| 204                    | Fautrel MD, Bruno                       | See above; Comité de Protection des Personnes (CPP) Ile de France VIII                                                                                                                                                            |
| 205                    | Bertin MD, Philippe<br>(did not enroll) | See above; Comité de Protection des Personnes (CPP) Ile de France VIII                                                                                                                                                            |
| 206                    | Combe MD, Bernard<br>(did not enroll)   | See above; Comité de Protection des Personnes (CPP) Ile de France VIII                                                                                                                                                            |
| Central IEC<br>Germany | --                                      | Ethik-Kommission der Ärztekammer Westfalen-Lippe und der Medizinischen Fakultät der Westfälischen Wilhelms-Universität Münster<br>Von-Esmarch-Str. 62<br>48149 Münster<br>GERMANY<br>Chairperson: Prof. Dr. Hans-Werner Bothe, MA |
| Central IEC<br>Germany | --                                      | Ethik-Kommission des Fachbereichs Medizin der Johann Wolfgang Goethe-Universität Frankfurt<br>Theodor-Stern-Kai 7<br>60590 Frankfurt am Main<br>GERMANY<br>Chairperson: Prof. Dr. med. Sebastian Harder                           |

| Site number            | Principal investigator                    | IRB/IEC name, address, and committee chairperson                                                                                                                                                                                                                  |
|------------------------|-------------------------------------------|-------------------------------------------------------------------------------------------------------------------------------------------------------------------------------------------------------------------------------------------------------------------|
| Central IEC<br>Germany | --                                        | Ethik-Kommission des Landes Berlin<br>Fehrbelliner Platz 1<br>10707 Berlin<br>GERMANY<br>Chairperson: PD Dr. med. K. Thomas Moesta                                                                                                                                |
| Central IEC<br>Germany | --                                        | Ethik-Kommission der Medizinischen Fakultät der<br>Ludwig-Maximilians Universität, München<br>Pettenkoferstr. 8a<br>80336 München<br>GERMANY<br>Chairperson: Prof. Dr. Wolfgang Eisenmenger                                                                       |
| 250                    | Braun MD, Jürgen                          | See above; Ethik-Kommission der Ärztekammer Westfalen-Lippe<br>und der Medizinischen Fakultät der Westfälischen Wilhelms-<br>Universität Münster                                                                                                                  |
| 252                    | Müller-Ladner MD, Ulf<br>(did not enroll) | See above; Ethik-Kommission der Ärztekammer Westfalen-Lippe<br>und der Medizinischen Fakultät der Westfälischen Wilhelms-<br>Universität Münster;<br><br>See above; Ethik-Kommission des Fachbereichs Medizin der<br>Johann Wolfgang Goethe-Universität Frankfurt |

| Site number | Principal investigator                                                                                                          | IRB/IEC name, address, and committee chairperson                                                                                                                                                                                                                                                              |
|-------------|---------------------------------------------------------------------------------------------------------------------------------|---------------------------------------------------------------------------------------------------------------------------------------------------------------------------------------------------------------------------------------------------------------------------------------------------------------|
| 253         | Stahl MD, Hans-Detlev<br>(replaced by Elizaveta Degtyareva, MD)<br>Degtyareva MD, Elizaveta<br>(replaced Hans-Detlev Stahl, MD) | See above; Ethik-Kommission der Ärztekammer Westfalen-Lippe und der Medizinischen Fakultät der Westfälischen Wilhelms-Universität Münster;<br><br>Ethikkommission bei der Sächsischen Landesärztekammer<br>Schützenhöhe 16<br>01099 Dresden<br>GERMANY<br>Chairperson: Prof. Dr. med. Rolf Haupt              |
| 254         | Wollenhaupt MD, Jürgen                                                                                                          | See above; Ethik-Kommission der Ärztekammer Westfalen-Lippe und der Medizinischen Fakultät der Westfälischen Wilhelms-Universität Münster;<br><br>Ethik-Kommission der Ärztekammer Hamburg<br>Humboldtstr. 67 a<br>22083 Hamburg<br>GERMANY<br>Chairperson: Prof. Dr. med. Thomas Weber                       |
| 255         | Bannert MD, Bettina<br>(did not enroll)                                                                                         | See above; Ethik-Kommission der Ärztekammer Westfalen-Lippe und der Medizinischen Fakultät der Westfälischen Wilhelms-Universität Münster;<br><br>Ethik-Kommission der Albert-Ludwigs-Universität Freiburg<br>Engelberger Str. 1<br>79106 Freiburg<br>GERMANY<br>Chairperson: Prof. Dr. Drs. Hc Stefan Pollak |

| Site number | Principal investigator   | IRB/IEC name, address, and committee chairperson                                                                                                                                                                                                                                                                  |
|-------------|--------------------------|-------------------------------------------------------------------------------------------------------------------------------------------------------------------------------------------------------------------------------------------------------------------------------------------------------------------|
| 256         | Wassenberg MD, Siegfried | <p>See above; Ethik-Kommission der Ärztekammer Westfalen-Lippe und der Medizinischen Fakultät der Westfälischen Wilhelms-Universität Münster;</p> <p>Ethik-Kommission der Ärztekammer Nordrhein<br/>Tersteegenstr. 31<br/>40474 Düsseldorf<br/>GERMANY<br/>Chairperson: Prof. Dr. Ursula Sehrt-Ricken (Essen)</p> |
| 257         | Sieper MD, Joachim       | <p>See above; Ethik-Kommission der Ärztekammer Westfalen-Lippe und der Medizinischen Fakultät der Westfälischen Wilhelms-Universität Münster;</p> <p>See above; Ethik-Kommission des Landes Berlin</p>                                                                                                            |
| 258         | Brandt-Jürgens MD, Jan   | <p>See above; Ethik-Kommission der Ärztekammer Westfalen-Lippe und der Medizinischen Fakultät der Westfälischen Wilhelms-Universität Münster;</p> <p>See above; Ethik-Kommission des Landes Berlin</p>                                                                                                            |

| Site number | Principal investigator                | IRB/IEC name, address, and committee chairperson                                                                                                                                                                                                                                                                                                                                        |
|-------------|---------------------------------------|-----------------------------------------------------------------------------------------------------------------------------------------------------------------------------------------------------------------------------------------------------------------------------------------------------------------------------------------------------------------------------------------|
| 259         | Gauler MD, Georg<br>(did not enroll)  | <p>See above; Ethik-Kommission der Ärztekammer Westfalen-Lippe und der Medizinischen Fakultät der Westfälischen Wilhelms-Universität Münster;</p> <p>Ethik-Kommission der Ärztekammer Niedersachsen<br/>Ethik-Kommission zur Beurteilung medizinischer Forschung am Menschen<br/>Berliner Allee 20<br/>30175 Hannover<br/>GERMANY<br/>Chairperson: Prof. Dr. Peter Kleine, Dr. jur.</p> |
| 260         | Witt MD, Matthias<br>(did not enroll) | <p>See above; Ethik-Kommission der Ärztekammer Westfalen-Lippe und der Medizinischen Fakultät der Westfälischen Wilhelms-Universität Münster;</p> <p>See above; Ethik-Kommission der Medizinischen Fakultät der Ludwig-Maximilians Universität, München</p>                                                                                                                             |
| 262         | Behrens MD, Frank<br>(did not enroll) | <p>See above; Ethik-Kommission der Ärztekammer Westfalen-Lippe und der Medizinischen Fakultät der Westfälischen Wilhelms-Universität Münster;</p> <p>See above; Ethik-Kommission des Fachbereichs Medizin der Johann Wolfgang Goethe-Universität Frankfurt</p>                                                                                                                          |
| 263         | Kellner MD, Herbert                   | <p>See above; Ethik-Kommission der Ärztekammer Westfalen-Lippe und der Medizinischen Fakultät der Westfälischen Wilhelms-Universität Münster;</p> <p>See above; Ethik-Kommission der Medizinischen Fakultät der Ludwig-Maximilians Universität, München</p>                                                                                                                             |

| Site number            | Principal investigator                   | IRB/IEC name, address, and committee chairperson                                                                                                                                              |
|------------------------|------------------------------------------|-----------------------------------------------------------------------------------------------------------------------------------------------------------------------------------------------|
| Central IEC<br>Hungary | --                                       | Egészségügyi Tudományos Tanács Klinikai Farmakológiai Etikai Bizottsága<br>Arany János. u. 6-8<br>1051 Budapest<br>HUNGARY<br>Chairperson: Dr. Susanna Fürst                                  |
| 300                    | Drescher MD, Edit                        | See above; Egészségügyi Tudományos Tanács Klinikai Farmakológiai Etikai Bizottsága                                                                                                            |
| 301                    | Keszthelyi MD, Péter<br>(did not enroll) | See above; Egészségügyi Tudományos Tanács Klinikai Farmakológiai Etikai Bizottsága                                                                                                            |
| 302                    | Szántó MD, Sándor                        | See above; Egészségügyi Tudományos Tanács Klinikai Farmakológiai Etikai Bizottsága                                                                                                            |
| 303                    | Újfalussy MD, Ilona                      | See above; Egészségügyi Tudományos Tanács Klinikai Farmakológiai Etikai Bizottsága                                                                                                            |
| 305                    | Géher MD, Pál                            | See above; Egészségügyi Tudományos Tanács Klinikai Farmakológiai Etikai Bizottsága                                                                                                            |
| 306                    | Tamási MD, László                        | See above; Egészségügyi Tudományos Tanács Klinikai Farmakológiai Etikai Bizottsága                                                                                                            |
| 350                    | Bombardieri MD, Stefano                  | Comitato Etico per la Sperimentazione Clinica dei Medicinali dell'Azienda Ospedaliera Universitaria Pisani di Pisa<br>Via Roma, 67<br>56126 Pisa<br>ITALY<br>Chairperson: Prof. Romano Danesi |

| Site number                    | Principal investigator                                                                                                  | IRB/IEC name, address, and committee chairperson                                                                                                                                                                            |
|--------------------------------|-------------------------------------------------------------------------------------------------------------------------|-----------------------------------------------------------------------------------------------------------------------------------------------------------------------------------------------------------------------------|
| 351                            | Matucci Cerinic MD, Marco                                                                                               | Comitato Etico per la Sperimentazione Clinica dei Medicinali dell'Azienda Ospedaliera-Universitaria Careggi<br>Largo Brambilla, 3<br>50134 Firenze<br>ITALY<br>Chairperson: Dr. ssa Raffaella Giardiello                    |
| 352                            | Grassi MD, Walter<br>(did not enroll)                                                                                   | Comitato Etico dell'Azienda Sanitaria Unica Regionale Delle Marche Di Ancona<br>Via Caduti del Lavoro, 40<br>60131 Ancona<br>ITALY<br>Chairperson: Dott. Gilberto Gentili                                                   |
| Central IEC<br>The Netherlands | --                                                                                                                      | Medische-Ethische Commissie academisch ziekenhuis Maastricht en Maastricht University (METC azM/UM)<br>P. Debyelaan 25<br>Postbus 5800<br>6202 AZ Maastricht<br>THE NETHERLANDS<br>Chairperson: Mw. Dr. CED de Die-Smulders |
| 400                            | Han MD, K. H.<br>(did not enroll)                                                                                       | See above; Medische-Ethische Commissie academisch ziekenhuis Maastricht en Maastricht University (METC azM/UM)                                                                                                              |
| 401                            | Landewé MD, Robert<br>(replaced by Astrid van Tubergen, MD)<br>van Tubergen MD, Astrid<br>(replaced Robert Landewé, MD) | See above; Medische-Ethische Commissie academisch ziekenhuis Maastricht en Maastricht University (METC azM/UM)                                                                                                              |



| Site number           | Principal investigator                | IRB/IEC name, address, and committee chairperson                                                                                              |
|-----------------------|---------------------------------------|-----------------------------------------------------------------------------------------------------------------------------------------------|
| Central IEC<br>Poland | --                                    | Komisja Bioetyczna przy Okregowej Izbie Lekarskiej w Krakowie<br>Krupnicza 11a<br>31-123 Krakow<br>POLAND<br>Chairperson: kol. Stefan Bednarz |
| 450                   | Chudzik MD, Dariusz                   | See above; Komisja Bioetyczna przy Okregowej Izbie Lekarskiej w Krakowie                                                                      |
| 452                   | Hrycaj MD, Pawel                      | See above; Komisja Bioetyczna przy Okregowej Izbie Lekarskiej w Krakowie                                                                      |
| 453                   | Jeka MD, Slawomir                     | See above; Komisja Bioetyczna przy Okregowej Izbie Lekarskiej w Krakowie                                                                      |
| 454                   | Leszczynski MD, Piotr                 | See above; Komisja Bioetyczna przy Okregowej Izbie Lekarskiej w Krakowie                                                                      |
| 455                   | Brzezicki MD, Jan                     | See above; Komisja Bioetyczna przy Okregowej Izbie Lekarskiej w Krakowie                                                                      |
| 456                   | Dudek MD, Anna                        | See above; Komisja Bioetyczna przy Okregowej Izbie Lekarskiej w Krakowie                                                                      |
| 457                   | Korkosz MD, Mariusz                   | See above; Komisja Bioetyczna przy Okregowej Izbie Lekarskiej w Krakowie                                                                      |
| 458                   | Racewicz MD, Artur                    | See above; Komisja Bioetyczna przy Okregowej Izbie Lekarskiej w Krakowie                                                                      |
| 459                   | Smolenska MD, Zaneta                  | See above; Komisja Bioetyczna przy Okregowej Izbie Lekarskiej w Krakowie                                                                      |
| 461                   | Brzosko MD, Marek<br>(did not enroll) | See above; Komisja Bioetyczna przy Okregowej Izbie Lekarskiej w Krakowie                                                                      |
| 462                   | Rell-Bakalarska MD, Maria             | See above; Komisja Bioetyczna przy Okregowej Izbie Lekarskiej w Krakowie                                                                      |

| Site number                   | Principal investigator               | IRB/IEC name, address, and committee chairperson                                                                                                                                        |
|-------------------------------|--------------------------------------|-----------------------------------------------------------------------------------------------------------------------------------------------------------------------------------------|
| 463                           | Zajdel MD, Jerzy<br>(did not enroll) | See above; Komisja Bioetyczna przy Okregowej Izbie Lekarskiej w Krakowie                                                                                                                |
| Central IEC<br>Czech Republic | --                                   | Etická komise IKEM a FTNsP<br>Fakultní Thomayerova nemocnice s poliklinikou<br>Videnská 800<br>140 59 Praha 4 – Krc<br>CZECH REPUBLIC<br>Chairperson: Prof. MUDr. Vladimír Staněk, CSc. |
| Central IRC<br>Czech Republic | --                                   | Etická komise<br>Revmatologický ústav<br>Na Slupi 4<br>128 50 Praha 2<br>CZECH REPUBLIC<br>Chairperson: RNDR. Ivana Pútová                                                              |
| 500                           | Dvorák MD, Zdenek                    | See above; Etická komise IKEM a FTNsP, Fakultní Thomayerova nemocnice s poliklinikou;<br><br>See above; Etická komise Revmatologický ústav                                              |
| 501                           | Novosad MD, Libor                    | See above; Etická komise IKEM a FTNsP, Fakultní Thomayerova nemocnice s poliklinikou;<br><br>See above; Etická komise Revmatologický ústav                                              |
| 502                           | Vencovský MD, Jirí                   | See above; Etická komise IKEM a FTNsP, Fakultní Thomayerova nemocnice s poliklinikou;<br><br>See above; Etická komise Revmatologický ústav                                              |

| Site number          | Principal investigator | IRB/IEC name, address, and committee chairperson                                                                                                                                                                                                               |
|----------------------|------------------------|----------------------------------------------------------------------------------------------------------------------------------------------------------------------------------------------------------------------------------------------------------------|
| 503                  | Vítek MD, Petr         | See above; Etická komise IKEM a FTNSP, Fakultní Thomayerova nemocnice s poliklinikou;<br><br>See above; Etická komise Revmatologický ústav                                                                                                                     |
| 504                  | Némec MD, Petr         | See above; Etická komise IKEM a FTNSP, Fakultní Thomayerova nemocnice s poliklinikou;<br><br>See above; Etická komise Revmatologický ústav                                                                                                                     |
| 505                  | Záhora MD, Roman       | See above; Etická komise IKEM a FTNSP, Fakultní Thomayerova nemocnice s poliklinikou;<br><br>See above; Etická komise Revmatologický ústav                                                                                                                     |
| Central IEC<br>Spain | --                     | Comité Ético de Investigación Clínica de Galicia<br>Unidad: Subdirección Xeral de Farmacia e Produtos Sanitarios.<br>Conselleria de Sanidade<br>San Lázaro, s/n<br>15703 Santiago Compostela (La Coruña)<br>SPAIN<br>Chairperson: Dr. Rosendo Bugarín González |
| Central IEC<br>Spain | --                     | CEIC Autonómico de Ensayos<br>Clínicos de Andalucía<br>Conserjería de Salud<br>Avenida de la Innovación, s/n<br>Edificio Arena 1<br>41020 Sevilla<br>SPAIN<br>Chairperson: Dr. Demetrio Mariano Aguayo Canela                                                  |

| Site number | Principal investigator                            | IRB/IEC name, address, and committee chairperson                                                                                                                                                                                                                                                                                                                                                                                                                                     |
|-------------|---------------------------------------------------|--------------------------------------------------------------------------------------------------------------------------------------------------------------------------------------------------------------------------------------------------------------------------------------------------------------------------------------------------------------------------------------------------------------------------------------------------------------------------------------|
| 550         | Chamizo Carmona MD, Eugenio<br>(did not enroll)   | <p>See above; Comité Ético de Investigación Clínica de Galicia<br/>Unidad: Subdirección Xeral de Farmacia e Produtos Sanitarios. Consellería de Sanidade;</p> <p>CEIC Hospital Universitario Infanta Cristina<br/>Departamento de Farmacología de la Facultad de Medicina<br/>Avenida de Elvas, s/n<br/>06008 Badajoz<br/>SPAIN<br/>Chairperson: Dra. Francisca Lourdes Márquez Pérez</p>                                                                                            |
| 551         | Collantes-Estévez MD, Eduardo<br>(did not enroll) | <p>See above; Comité Ético de Investigación Clínica de Galicia<br/>Unidad: Subdirección Xeral de Farmacia e Produtos Sanitarios. Consellería de Sanidade;</p> <p>See above; CEIC Autonómico de Ensayos, Clínicos de Andalucía, Conserjería de Salud;</p> <p>Secretaría Técnica del CEIC<br/>Hospital Universitario Reina Sofía<br/>Edificio Consultas Externas pl-1<br/>Avenida Menéndez Pidal, s/n<br/>14004 Córdoba<br/>SPAIN<br/>Chairperson: Dr. Jose Luis Barranco Quintana</p> |
| 552         | Gómez-Reino MD, Juan J.<br>(did not enroll)       | <p>See above; Comité Ético de Investigación Clínica de Galicia<br/>Unidad: Subdirección Xeral de Farmacia e Produtos Sanitarios. Consellería de Sanidade</p>                                                                                                                                                                                                                                                                                                                         |

| Site number | Principal investigator        | IRB/IEC name, address, and committee chairperson                                                                                                                                                                                                                                                                                                                                                                                                                |
|-------------|-------------------------------|-----------------------------------------------------------------------------------------------------------------------------------------------------------------------------------------------------------------------------------------------------------------------------------------------------------------------------------------------------------------------------------------------------------------------------------------------------------------|
| 553         | Navarro MD, Federico          | <p>See above; Comité Ético de Investigación Clínica de Galicia<br/>Unidad: Subdirección Xeral de Farmacia e Produtos Sanitarios. Conselleria de Sanidade;</p> <p>See above; CEIC Autonómico de Ensayos, Clínicos de Andalucía, Conserjería de Salud;</p> <p>CEIC del Hospital Universitario Virgen Macarena<br/>Avenida Dr. Fedriani, 3<br/>2a planta, Unidad de Investigación<br/>41009 Sevilla<br/>SPAIN<br/>Chairperson: Dr. D. Miguel Ángel Rico Corral</p> |
| 554         | González Gay MD, Miguel Ángel | <p>See above: Comité Ético de Investigación Clínica de Galicia<br/>Unidad: Subdirección Xeral de Farmacia e Produtos Sanitarios. Conselleria de Sanidade;</p> <p>Comité Etico de Investigación Clínica de Cantabria<br/>Fundación Marqués de Valdecilla<br/>Escuela Universitaria de Enfermería – planta 5a<br/>Avenida de Valdecilla, s/n<br/>39008 Santander (Cantabria)<br/>SPAIN<br/>Chairperson: D. Carlos G. Redondo Figuero</p>                          |

| Site number                   | Principal investigator  | IRB/IEC name, address, and committee chairperson                                                                                                                                                                                                               |
|-------------------------------|-------------------------|----------------------------------------------------------------------------------------------------------------------------------------------------------------------------------------------------------------------------------------------------------------|
| Central IEC<br>United Kingdom | --                      | Leicestershire, Northamptonshire and Rutland<br>Research Ethics Committee 2<br>The Old Chapel<br>Royal Standard Place<br>Nottingham<br>NG1 6GN<br>UNITED KINGDOM<br>Chairperson: Dr. Carl Edwards                                                              |
| 600                           | Marzo-Ortega MD, Helena | See above; Leicestershire, Northamptonshire and Rutland<br>Research Ethics Committee 2;<br><br>Leeds Teaching Hospital NHS Trust<br>Research & Development Directorate<br>34 Hyde Terrace<br>Leeds<br>LS2 9LN<br>UNITED KINGDOM<br>Chairperson: Dr. Steve Smye |

| Site number | Principal investigator                 | IRB/IEC name, address, and committee chairperson                                                                                                                                                                                                                                                           |
|-------------|----------------------------------------|------------------------------------------------------------------------------------------------------------------------------------------------------------------------------------------------------------------------------------------------------------------------------------------------------------|
| 601         | Cooper MD, Robert                      | <p>See above; Leicestershire, Northamptonshire and Rutland Research Ethics Committee 2;</p> <p>Salford Royal NHS Foundation Trust<br/>Research &amp; Development Department<br/>Summerfield House<br/>554 Eccles New Road<br/>Salford<br/>M5 5AP<br/>UNITED KINGDOM<br/>Chairperson: Prof. Bill Ollier</p> |
| 602         | Donnelly MD, Simon<br>(did not enroll) | <p>See above; Leicestershire, Northamptonshire and Rutland Research Ethics Committee 2;</p> <p>Whipps Cross University Hospital<br/>Research &amp; Development Unit<br/>Room 24, Willow Lodge<br/>Leytonstone<br/>London<br/>E11 1NR<br/>UNITED KINGDOM<br/>Chairperson: Mr. James Green</p>               |

| Site number | Principal investigator                        | IRB/IEC name, address, and committee chairperson                                                                                                                                                                                                                               |
|-------------|-----------------------------------------------|--------------------------------------------------------------------------------------------------------------------------------------------------------------------------------------------------------------------------------------------------------------------------------|
| 603         | O'Reilly MD, David<br>(did not enroll)        | See above; Leicestershire, Northamptonshire and Rutland<br>Research Ethics Committee 2;<br><br>West Suffolk Hospital NHS Trust<br>Research & Development Office<br>Bury St. Edmonds<br>IP33 2QZ<br>UNITED KINGDOM<br>Chairperson: Dr. John Hall                                |
| 604         | Wilson MD, Anthony Gerard<br>(did not enroll) | See above; Leicestershire, Northamptonshire and Rutland<br>Research Ethics Committee 2;<br><br>Sheffield Teaching Hospital NHS Trust<br>Research & Development<br>1st Floor<br>11 Brommfield Road<br>Sheffield<br>S10 2SE<br>UNITED KINGDOM<br>Chairperson: Prof. Simon Heller |



| Site number              | Principal investigator           | IRB/IEC name, address, and committee chairperson                                                                                                                                                                                                                                                                    |
|--------------------------|----------------------------------|---------------------------------------------------------------------------------------------------------------------------------------------------------------------------------------------------------------------------------------------------------------------------------------------------------------------|
| 605                      | Adebajo MD, Adewale              | <p>See above; Leicestershire, Northamptonshire and Rutland Research Ethics Committee 2;</p> <p>Barnsley Hospital<br/>Research &amp; Development Directorate<br/>Gawber Road<br/>Barnsley<br/>S75 2EP<br/>UNITED KINGDOM<br/>Chairperson: Prof. Stuart G. Parker</p>                                                 |
| Central IEC<br>Argentina | --                               | <p>Comité Independiente de Ética para Ensayos en Farmacología Clínica<br/>J. E. Uriburu 774, 1st Floor, Apt. C<br/>(C1027AAP) Ciudad Autónoma de Buenos Aires<br/>ARGENTINA<br/>Chairperson: Prof. Dr. Luis M. Zieher</p>                                                                                           |
| 700                      | Maldonado Cocco MD, José Antonio | <p>See above; Comité Independiente de Ética para Ensayos en Farmacología Clínica;</p> <p>Comité de Docencia e Investigación de Consultorios Reumatológicos Pampa<br/>La Pampa 1548, 1st Floor, Apt. A<br/>(C1428DZF) Ciudad Autónoma de Buenos Aires<br/>ARGENTINA<br/>Chairperson: Dr. Alberto Rodriguez Velez</p> |

| Site number | Principal investigator     | IRB/IEC name, address, and committee chairperson                                                                                                                                                                                                                                                                                                                                          |
|-------------|----------------------------|-------------------------------------------------------------------------------------------------------------------------------------------------------------------------------------------------------------------------------------------------------------------------------------------------------------------------------------------------------------------------------------------|
| 701         | Eimon MD, Alicia           | <p>Comité de Ética en Investigación;<br/>           Centro de Educación Médica e Investigaciones Clínicas<br/>           “Norberto Quirno” (CEMIC)<br/>           Galvan 4102<br/>           (C1431FWO) Ciudad Autónoma de Buenos Aires<br/>           ARGENTINA<br/>           Chairperson: Prof. Enrique Gadow</p>                                                                      |
| 702         | Spindler MD, Alberto Jorge | <p>See above; Comité Independiente de Ética para Ensayos en<br/>           Farmacología Clínica;</p> <p>Comité de Docencia e Investigación<br/>           Centro Médico Privado de Reumatología<br/>           Lavalle 506<br/>           (T4000AXL) San Miguel de Tucumán<br/>           Tucumán<br/>           ARGENTINA<br/>           Chairperson: Prof. Dra. Sofía Amenabar</p>      |
| 704         | Mysler MD, Eduardo F.      | <p>See above; Comité Independiente de Ética para Ensayos en<br/>           Farmacología Clínica;</p> <p>Comité de Docencia e Investigación<br/>           Organización Médica para la Investigación (OMI)<br/>           Uruguay 725, Ground Floor<br/>           (C1015ABO) Ciudad Autónoma de Buenos Aires<br/>           ARGENTINA<br/>           Chairperson: Dr. Marcelo Radisic</p> |

| Site number | Principal investigator         | IRB/IEC name, address, and committee chairperson                                                                                                                                                                                                   |
|-------------|--------------------------------|----------------------------------------------------------------------------------------------------------------------------------------------------------------------------------------------------------------------------------------------------|
| 705         | Alvarellos MD, Alejandro       | Comité de Revision Interna<br>Hospital Privado Centro Médico de Cordoba<br>Naciones Unidas 346<br>(5016) Córdoba<br>Córdoba<br>ARGENTINA<br>Chairperson: Dr. Sergio Metrebián                                                                      |
| 706         | Pons Estel MD, Bernado Antonio | See above; Comité Independiente de Ética para Ensayos en Farmacología Clínica;<br><br>Comité de Docencia e Investigación del Sanatorio Parque<br>Boulevard Oroño 860<br>(2000) Rosario<br>Sante Fe<br>ARGENTINA<br>Chairperson: Dr. Carlos Lovesio |

| Site number | Principal investigator                 | IRB/IEC name, address, and committee chairperson                                                                                                                                                                                                                                                                                                                                                                                                                                |
|-------------|----------------------------------------|---------------------------------------------------------------------------------------------------------------------------------------------------------------------------------------------------------------------------------------------------------------------------------------------------------------------------------------------------------------------------------------------------------------------------------------------------------------------------------|
| 707         | Rillo MD, Oscar L.<br>(did not enroll) | <p>See above; Comité Independiente de Ética para Ensayos en Farmacología Clínica;</p> <p>Comité de Ética en Investigación<br/>Hospital Sirio Libanes<br/>Campana 4658<br/>(C1419AHN) Ciudad Autónoma de Buenos Aires<br/>ARGENTINA<br/>Chairperson: Dr. Roberto Cataldi Amatriain;</p> <p>Comité de Docencia e Investigación<br/>Hospital Sirio Libanes<br/>Campana 4658<br/>(C1419AHN) Ciudad Autónoma de Buenos Aires<br/>ARGENTINA<br/>Chairperson: Dr. Gustavo Frechtel</p> |
| 708         | Lucero MD, Eleonora                    | <p>Comité de Ética Independiente;<br/>Centro de Investigaciones Reumatológicas<br/>Las Piedras 108<br/>(T4000BRD) San Miguel de Tucumán<br/>Tucumán<br/>ARGENTINA<br/>Chairperson: Dra. Gabriela Eva Maria Perez</p>                                                                                                                                                                                                                                                            |

| Site number           | Principal investigator                              | IRB/IEC name, address, and committee chairperson                                                                                                                                                                                                                                                         |
|-----------------------|-----------------------------------------------------|----------------------------------------------------------------------------------------------------------------------------------------------------------------------------------------------------------------------------------------------------------------------------------------------------------|
| 709                   | Granel MD, Amelia Beatriz<br>(did not enroll)       | Comité de Ética de DER Investigaciones Clínicas<br>Vicente Lopez 1441<br>(B1878DVN) Quilmes<br>Buenos Aires<br>ARGENTINA<br>Chairperson: Abog. Damián Edgardo Del Percio                                                                                                                                 |
| 710                   | Pardo Hidalgo MD, Rodolfo Ariel<br>(did not enroll) | See above; Comité Independiente de Ética para Ensayos en Farmacología Clínica;<br><br>Comité de Docencia e Investigación del Centro Polivalente de Asistencia e Investigación Clínica CER San Juan<br>Lapride 568 Este<br>(5400) San Juan<br>San Juan<br>ARGENTINA<br>Chairperson: Dr. Luis Angel Castro |
| Central IEC<br>Brazil | --                                                  | Conselho Nacional de Ética em Pesquisa – CONEP<br>Esplanada dos Ministérios<br>Bloco G, Anexo B – sala 436 b<br>Brasilia DF<br>Cep: 70.058-900<br>BRAZIL<br>Chairperson: Dr. Gyselle Saddi Tannous                                                                                                       |

| Site number | Principal investigator                           | IRB/IEC name, address, and committee chairperson                                                                                                                                                                                                                                                                   |
|-------------|--------------------------------------------------|--------------------------------------------------------------------------------------------------------------------------------------------------------------------------------------------------------------------------------------------------------------------------------------------------------------------|
| 750         | Azevedo MD, Valderílio Feijó                     | <p>See above; Conselho Nacional de Ética em Pesquisa – CONEP;</p> <p>Comité de Ética em Pesquisa em Seres Humanos<br/>Centro de Estudos Superiores Positivo – UNICENP/PR<br/>Rua Pedro Viriato Parigot de Souza, 5300<br/>Curitiba PR<br/>Cep: 81280-330<br/>BRAZIL<br/>Chairperson: Dr. Maria Fernanda Torres</p> |
| 753         | Keiserman MD, Mauro Waldemar<br>(did not enroll) | <p>See above; Conselho Nacional de Ética em Pesquisa – CONEP;</p> <p>Comité de Ética em Pesquisa da Pontifícia Universidade Católica do Rio Grande do Sul – PUC/RS<br/>Av Ipiranga, 6690<br/>3o andar<br/>Porto Alegre RS<br/>Cep: 90610-000<br/>BRAZIL<br/>Chairperson: Dr. Rodolfo Herberto Schneider</p>        |

| Site number | Principal investigator                                       | IRB/IEC name, address, and committee chairperson                                                                                                                                                                                                                                                                                       |
|-------------|--------------------------------------------------------------|----------------------------------------------------------------------------------------------------------------------------------------------------------------------------------------------------------------------------------------------------------------------------------------------------------------------------------------|
| 755         | Zerbini MD, Cristiano Augusto de Freitas<br>(did not enroll) | See above; Conselho Nacional de Ética em Pesquisa-<br>CONEP;<br>UGAI – Unidade de Gestao Assistencial<br>Hospital Heliopolis<br>Comité de Ética em Pesquisa<br>Rua Conego Xavier<br>276 – 10oandar, Sacoma<br>Sao Paulo SP<br>Cep: 04231-030<br>BRAZIL<br>Chairperson: Dr. Jozias de Andrade Sobrinho                                  |
| 756         | Chahade MD, William Habib                                    | See above; Conselho Nacional de Ética em Pesquisa –<br>CONEP;<br>Comité de Ética em Pesquisa do Instituto de Assistência<br>Médica ao Servidor Público Esadual / IAMSPE / HSPE –<br>“FMO”<br>Rua Pedro de Toledo, 1800<br>3° andar – ala central<br>São Paulo SP<br>Cep:04039-901<br>BRAZIL<br>Chairperson: Dr. Roberto Dantas Queiroz |

| Site number | Principal investigator                     | IRB/IEC name, address, and committee chairperson                                                                                                                                                                                                                                                                                                              |
|-------------|--------------------------------------------|---------------------------------------------------------------------------------------------------------------------------------------------------------------------------------------------------------------------------------------------------------------------------------------------------------------------------------------------------------------|
| 757         | da Silva MD, Nilzio A.<br>(did not enroll) | See above; Conselho Nacional de Ética em Pesquisa – CONEP;<br><br>Comité de Ética em Pesquisa em Seres Humanos das Clínicas da Universidade Federal de Goiás/GO<br>Primeira Venida, s/n, Setor Leste Universitário<br>2º andar – UPC – Unidade de Pesquisa Clínica<br>Goiânia GO<br>Cep: 74605-050<br>BRAZIL<br>Chairperson: Dr. João Carlos da Rocha Medrado |
| 760         | Bertolo MD, Manoel Barros                  | See above; Conselho Nacional de Ética em Pesquisa – CONEP;<br><br>Comité de Ética em Pesquisa – UNICAMP<br>Rua Tessália Vieira de Camargo, 126<br>Campinas SP<br>Cep: 13083-887<br>BRAZIL<br>Chairperson: Dr. Carlos Eduardo Steiner                                                                                                                          |
| 761         | Ximenes MD, Antonio Carlos                 | See above; Conselho Nacional de Ética em Pesquisa – CONEP;<br><br>Comité de Ética em Pesquisa do Hospital Geral de Goiânia<br>Av. Anhanguera, 6479 – Setor Oeste<br>Goiânia GO<br>Cep: 74110-010<br>BRAZIL<br>Chairperson: Dr. Fábio Péclat do Santos                                                                                                         |



| Site number           | Principal investigator                        | IRB/IEC name, address, and committee chairperson                                                                                                                                                                                                                                                                             |
|-----------------------|-----------------------------------------------|------------------------------------------------------------------------------------------------------------------------------------------------------------------------------------------------------------------------------------------------------------------------------------------------------------------------------|
| 801                   | Esquivel Valerio MD, Jorge Antonio            | Comité de Ética de la Facultad de Medicina de la Universidad Autónoma de Nuevo León (UANL). y Hospital Universitario "Dr. José Eleuterio González"<br>Av. Francisco I. Madero y Av. Dr. Aguirre Pequeño s/n<br>Col. Mitras Centro<br>C.P. 64460, Monterrey, Nuevo León<br>MEXICO<br>Chairperson: Dr. José Gerardo Garza Leal |
| 802                   | Xibillé Friedmann MD, Daniel Xavier           | Comité de Ética en Investigación del Hospital Inovamed<br>Calle Cuauhtémoc #305, Col. Lomas de la Selva<br>C.P. 62270, Cuernavaca Morelos<br>MEXICO<br>Chairperson: Dr. Bernardo J. Rubio Cano                                                                                                                               |
| 803                   | García García MD, Conrado<br>(did not enroll) | Comité Bioético para la Investigación Clínica, S.C.<br>Puebla # 422-4, Col. Roma Sur, Del . Cuauhtémoc<br>C.P. 06700, México, D.F.<br>MÉXICO<br>Chairperson: Biol. Celia Ovadia Savariego                                                                                                                                    |
| Central IEC<br>Canada | --                                            | Quorum Review Institutional Review Board<br>1601 Fifth Avenue, Suite 100<br>Seattle, WA 98101<br>UNITED STATES<br>Chairperson: David B. Kelley, MD                                                                                                                                                                           |
| 900                   | Khraishi MD, Majed Mustafa                    | See above; Quorum Review Institutional Review Board                                                                                                                                                                                                                                                                          |

| Site number | Principal investigator                        | IRB/IEC name, address, and committee chairperson                                                                                                                                                             |
|-------------|-----------------------------------------------|--------------------------------------------------------------------------------------------------------------------------------------------------------------------------------------------------------------|
| 901         | Rahman MD, Al-Amin Proton<br>(did not enroll) | Human Investigation Committee<br>2nd Floor, Eastern Trust Building<br>95 Bonavenutre Avenue<br>St. John's, NL A1B 2X5<br>CANADA<br>Chairpersons: John Harnett, MD (co-chair) and Fern Brunger, MD (co-chair) |
| 902         | Beaulieu MD, André<br>(did not enroll)        | See above; Quorum Review Institutional Review Board                                                                                                                                                          |
| 903         | Thomson MD, Glen T. D.                        | See above; Quorum Review Institutional Review Board                                                                                                                                                          |
| 905         | Tremblay MD, Jean-Luc<br>(did not enroll)     | See above; Quorum Review Institutional Review Board                                                                                                                                                          |
| 906         | Inman MD, Robert Davies<br>(did not enroll)   | University Health Network Research Ethics Board<br>Hydro Building, 10 <sup>th</sup> Floor, Suite 1056<br>700 University Avenue<br>Toronto, ON M5G 1Z5<br>CANADA<br>Chairperson: Karen McRae, MD              |
| 907         | Baker MD, Milton F.                           | See above; Quorum Review Institutional Review Board                                                                                                                                                          |
| 908         | Keystone MD, Edward C.<br>(did not enroll)    | Mount Sinai Hospital Research Ethics Board<br>600 University Avenue<br>Toronto, ON M5X 1G5<br>CANADA<br>Chairperson: Ron Heslegrave, MD                                                                      |
| 910         | Rodrigues MD, Jude F.                         | See above; Quorum Review Institutional Review Board                                                                                                                                                          |

| Site number                  | Principal investigator                                                                                      | IRB/IEC name, address, and committee chairperson                                                                                                   |
|------------------------------|-------------------------------------------------------------------------------------------------------------|----------------------------------------------------------------------------------------------------------------------------------------------------|
| 912                          | Haraoui MD, Boulos<br>(did not enroll)                                                                      | See above; Quorum Review Institutional Review Board                                                                                                |
| Central IEC<br>United States | --                                                                                                          | Quorum Review Institutional Review Board<br>1601 Fifth Avenue, Suite 100<br>Seattle, WA 98101<br>UNITED STATES<br>Chairperson: David B. Kelley, MD |
| 950                          | Baldassare MD, Andrew<br>(replaced by Akgun Ince, MD)<br>Ince MD, Akgun<br>(replaced Andrew Baldassare, MD) | See above; Quorum Review Institutional Review Board                                                                                                |
| 951                          | Diab MD, Isam A.                                                                                            | See above; Quorum Review Institutional Review Board                                                                                                |
| 952                          | Dikranian MD, Ara<br>(did not enroll)                                                                       | See above; Quorum Review Institutional Review Board                                                                                                |
| 953                          | Jones MD, Richard E., III<br>(did not enroll)                                                               | See above; Quorum Review Institutional Review Board                                                                                                |
| 954                          | Schechtman DO, Joy                                                                                          | See above; Quorum Review Institutional Review Board                                                                                                |
| 956                          | Bagheri MD, Shahin<br>(did not enroll)                                                                      | See above; Quorum Review Institutional Review Board                                                                                                |
| 957                          | Gaylis MD, Norman B.                                                                                        | See above; Quorum Review Institutional Review Board                                                                                                |
| 958                          | Kennedy MD, Alastair C.                                                                                     | See above; Quorum Review Institutional Review Board                                                                                                |
| 959                          | Oza MD, Meera R.                                                                                            | See above; Quorum Review Institutional Review Board                                                                                                |
| 960                          | Swartz MD, Timothy J.<br>(did not enroll)                                                                   | See above; Quorum Review Institutional Review Board                                                                                                |
| 961                          | Turkiewicz MD, Anthony M.                                                                                   | See above; Quorum Review Institutional Review Board                                                                                                |

| <b>Site number</b> | <b>Principal investigator</b>              | <b>IRB/IEC name, address, and committee chairperson</b>                                                                                                                  |
|--------------------|--------------------------------------------|--------------------------------------------------------------------------------------------------------------------------------------------------------------------------|
| 962                | Sherrer MD, Yvonne R.                      | See above; Quorum Review Institutional Review Board                                                                                                                      |
| 963                | Gough MD, William                          | See above; Quorum Review Institutional Review Board                                                                                                                      |
| 964                | Howell MD, Mary P.                         | See above; Quorum Review Institutional Review Board                                                                                                                      |
| 965                | Rosenberg MD, David S.<br>(did not enroll) | See above; Quorum Review Institutional Review Board                                                                                                                      |
| 966                | Greenwald MD, Maria W.                     | See above; Quorum Review Institutional Review Board                                                                                                                      |
| 967                | Stolow MD, Joshua B.                       | See above; Quorum Review Institutional Review Board                                                                                                                      |
| 968                | Mease MD, Philip J.                        | Western Institutional Review Board<br>3535 Seventh Avenue SW<br>Olympia, WA 98502<br>UNITED STATES<br>Chairperson: Theodore D. Schultz, JD                               |
| 969                | Moreta Freire MD, Elvia G.                 | See above; Quorum Review Institutional Review Board                                                                                                                      |
| 970                | Codding MD, Christine E.                   | See above; Quorum Review Institutional Review Board                                                                                                                      |
| 971                | Rizzo MD, Warren C.<br>(did not enroll)    | See above; Quorum Review Institutional Review Board                                                                                                                      |
| 972                | Kivitz MD, Alan J.                         | See above; Quorum Review Institutional Review Board                                                                                                                      |
| 973                | Wallace MD, Daniel J.<br>(did not enroll)  | Cedars Sinai Medical Center Institutional Review Board<br>8383 Wilshire Boulevard, Suite 742<br>Beverly Hills, CA 90211<br>UNITED STATES<br>Chairperson: Stephen Lim, MD |

| Site number | Principal investigator                     | IRB/IEC name, address, and committee chairperson                                                                                                                                                  |
|-------------|--------------------------------------------|---------------------------------------------------------------------------------------------------------------------------------------------------------------------------------------------------|
| 974         | Kavanaugh MD, Arthur F.                    | University of California, San Diego Human Research Protection Program<br>8950 Villa La Jolla Drive, Suite A 208<br>La Jolla, CA 92037<br>UNITED STATES<br>Chairperson: Michael Caligiuri, PhD     |
| 975         | Fleischmann MD, Roy M.                     | See above; Quorum Review Institutional Review Board                                                                                                                                               |
| 977         | Khan MD, Muhammed Asim<br>(did not enroll) | MetroHealth Medical Center Institutional Review Board<br>2500 MetroHealth Drive, Room 103 Rammelkamp<br>Cleveland, OH 44109<br>UNITED STATES<br>Chairperson: David Kuentz, DO, MBA                |
| 978         | Wellborne DO, Frank R.<br>(did not enroll) | See above; Quorum Review Institutional Review Board                                                                                                                                               |
| 981         | Walsh MD, Jessica                          | University of Utah Institutional Review Board<br>Research Administration Building<br>75 South 2000 East<br>Salt Lake City, UT 84112<br>UNITED STATES<br>Chairperson: John Stillman                |
| 982         | Deodhar MD, Atulya A.                      | Oregon Health & Science University Institutional Review Board<br>Mail Code L1 06, 3181 SW Sam Jackson Park Road<br>Portland, OR 97239<br>UNITED STATES<br>Chairperson: Susan B. Bankowski, MS, JD |

| Site number | Principal investigator                           | IRB/IEC name, address, and committee chairperson                                                                                                           |
|-------------|--------------------------------------------------|------------------------------------------------------------------------------------------------------------------------------------------------------------|
| 983         | Reveille MD, John D.                             | Committee for the Protection of Human Subjects<br>6410 Fannin Street, Suite 1100<br>Houston, TX 77030<br>UNITED STATES<br>Chairperson: George Stancel, PhD |
| 984         | Hensarling MD, James Kenneth<br>(did not enroll) | See above; Quorum Review Institutional Review Board                                                                                                        |
| 985         | Goddard MD, David Harry                          | See above; Quorum Review Institutional Review Board                                                                                                        |
| 986         | Kremer MD, Joel M.<br>(did not enroll)           | See above; Quorum Review Institutional Review Board                                                                                                        |
| 987         | Maricic MD, Michael                              | See above; Quorum Review Institutional Review Board                                                                                                        |
| 989         | Schnitz MD, William M.<br>(did not enroll)       | See above; Quorum Review Institutional Review Board                                                                                                        |
| 990         | Figueroa MD, Debra P.                            | See above; Quorum Review Institutional Review Board                                                                                                        |
